# Supplementary material for: Photostable phosphorescent polymer nanospheres for high sensitivity detection
Source: Royal Society of Chemistry journal article supplement (doi:10.1039/c5tc00933b), 2015-01-01
Supplement: c5tc00933b1.pdf [file c5tc00933b1.pdf]

ELECTRONIC SUPPLEMENTARY INFORMATION FOR

**Photostable phosphorescent polymer nanospheres for high sensitivity detection**

A. N. Edwards,<sup>†‡</sup> M. Yamazaki,<sup>†</sup> S. H. Krishnadasan, , T. W. Phillips, L. Rowlands,  
R. Jourdain, A. M. Nightingale<sup>§</sup> and J. C. de Mello<sup>\*</sup>

Department of Chemistry, Imperial College London, Exhibition Road,  
South Kensington, London SW7 2AY, UK

<sup>‡</sup>Now at Department of Materials Science and Engineering, University of Arizona,  
4715 E Fort Lowell Road, Tucson, Arizona 85712, USA

<sup>§</sup>Now at Faculty of Engineering and the Environment, University of Southampton,  
Highfield, Southampton SO17 1BJ, UK

\*j.demello@imperial.ac.uk

---

<sup>†</sup> These authors contributed equally to this work.

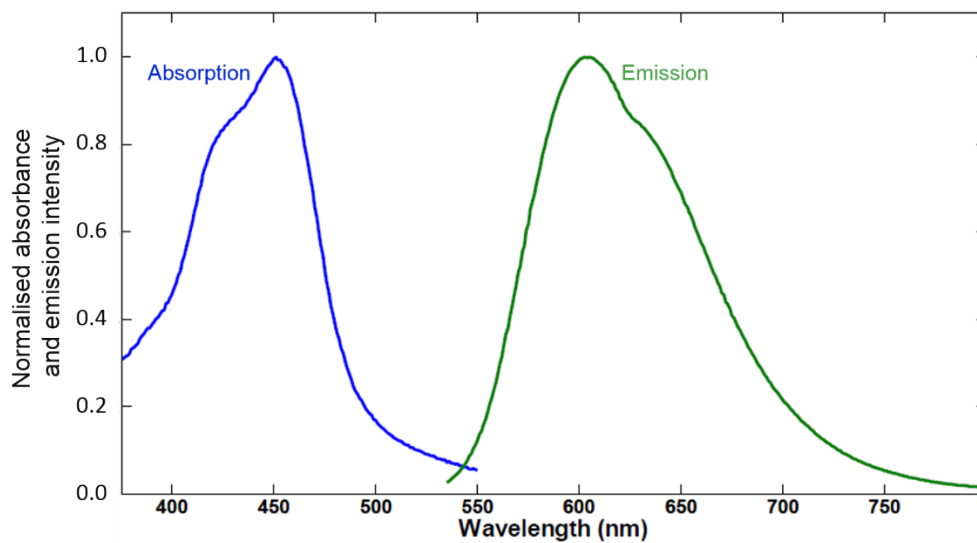

**Figure S11:** Normalised absorption and photoluminescence emission spectra for free  $\text{Ru}(\text{dpp})_3\text{Cl}_2$  dye in deoxygenated ethanol. Note, ethanol was selected as the solvent because the dye is only sparingly soluble in water.

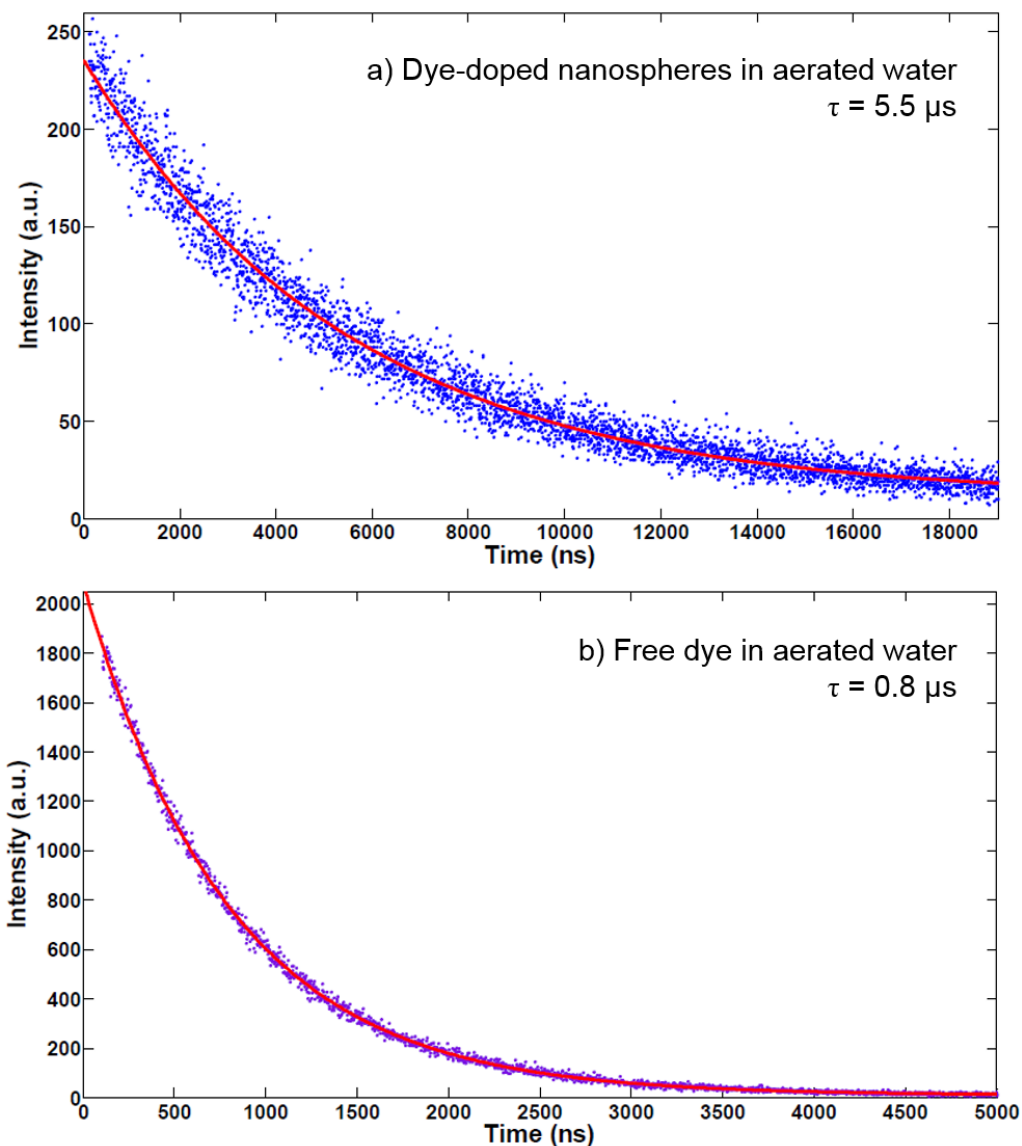

**Figure S12:** Phosphorescence decay curves for (a) crosslinked nanospheres doped with  $\text{Ru}(\text{dpp})_3\text{Cl}_2$  and (b) free  $\text{Ru}(\text{dpp})_3\text{Cl}_2$  dye. Traces were recorded in aerated deionized water. The solid lines show fits to a monoexponential decay function from which the lifetime  $\tau$  was determined.

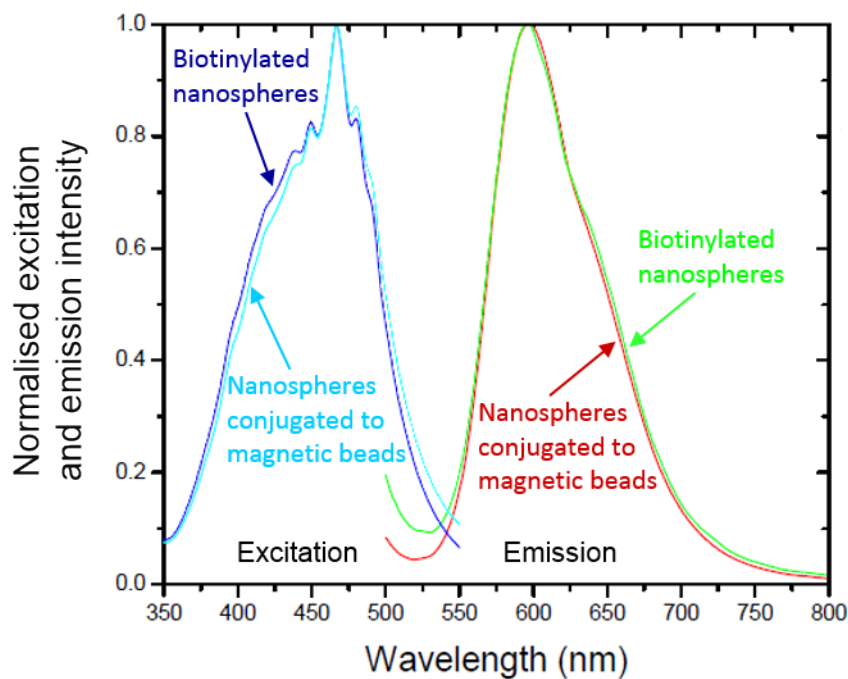

**Figure S13:** Normalised excitation and emission spectra of biotinylated nanospheres in water before and after conjugation to streptavidin-coated magnetic beads, showing minimal changes in the spectral properties.

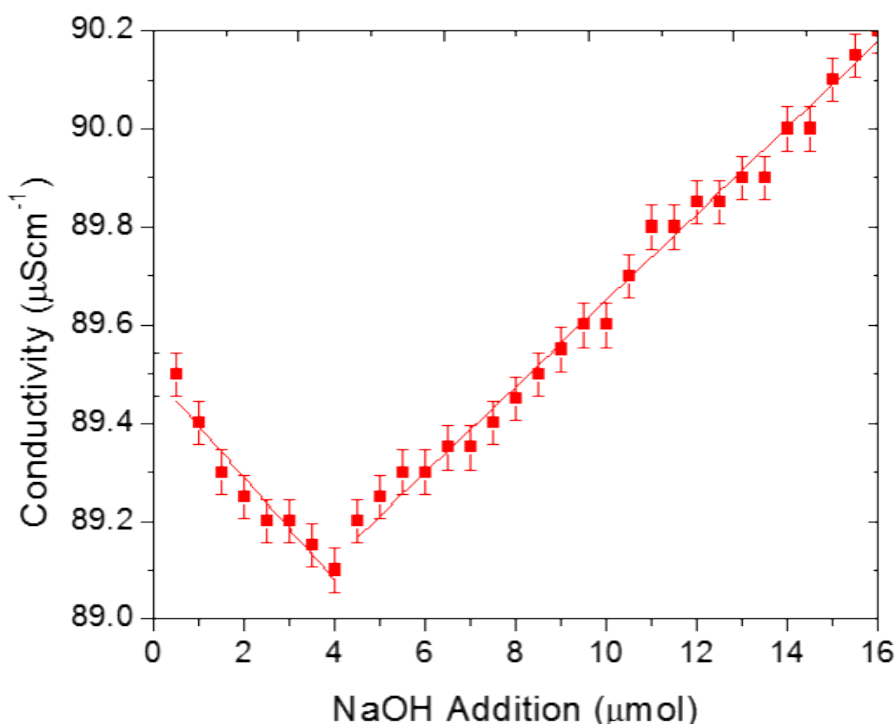

**Figure S14:** Conductometric titration curves<sup>1-3</sup> obtained by adding 1 ml of 0.05 M NaOH to 49 ml of nanosphere solution (containing 114.5 mg dry mass). The measured conductance falls linearly with the volume of added NaOH solution until reaching a minimum value at 76.8  $\mu\text{l}$  (3.84  $\mu\text{Mol}$ ), beyond with it starts to rise. The observed behaviour is consistent with low mobility  $\text{Na}^+$  ions replacing fast-mobility  $\text{H}^+$  ions from the surface carboxylic acid groups, and so causing a drop in conductivity until 'equivalence' is reached, beyond which the conductivity rises due to the increasing  $\text{Na}^+$  concentration. Assuming only surface hydroxylic acid groups are accessible, taking the diameter of the (spherical) nanospheres to be 300 nm, and assuming a density of  $\sim 1 \text{ g/cm}^3$  for the host matrix, the number of surface groups per particle is found to be  $\sim 300,000$  (equivalent to one surface carboxylic acid group per square nanometre).

1. J. Hen, *Journal of Colloid and Interface Science*, 1974, 49, 425-432.
2. Z. L. Liu, Z. H. Ding, K. L. Yao, J. Tao, G. H. Du, Q. H. Lu, X. Wang, F. L. Gong and X. Chen, *Journal of Magnetism and Magnetic Materials*, 2003, 265, 98-105.
3. H. A. Pohl, *Analytical Chemistry*, 1954, 26, 1614-1616.
